# Supplementary material for: Pathogen Profile of Children Hospitalised with Severe Acute Respiratory Infections during COVID-19 Pandemic in the Free State Province, South Africa
Source: MDPI journal article supplement (doi:10.3390/ijerph191610418), 2022-08-21
Supplement: s1 [file s1]

**Table S1.** Pathogen and clinical profile of individual participants included in the study.

| Sample No | Record No | Age              | Gender | Feeding difficulty | HIV Infected | Need for oxygen | Chest Indrawing | ICU Admission | Asthmatic | Viruses detected using QiaStat and Ct Values                        |
|-----------|-----------|------------------|--------|--------------------|--------------|-----------------|-----------------|---------------|-----------|---------------------------------------------------------------------|
| 1.        | A301      | 2 years 5 months | Female | No                 | No           | Yes             | Yes             | No            | No        | Rhinovirus/Enterovirus (31.4), Adenovirus (35.7), SARS-CoV-2 (35.2) |
| 2.        | Z55       | 1 Year 4 Months  | Male   | No                 | No           | No              | No              | No            | No        | Rhinovirus/Enterovirus (33.5), RSV A+B (25.3), SARS-CoV-2 (35.5)    |
| 3.        | Z11       | 7 months         | Male   | No                 | No           | No              | No              | No            | No        | Rhinovirus/Enterovirus (31.9), RSV A+B (27.7)                       |
| 4.        | A29       | 11 months        | Male   | No                 | No           | Yes             | Yes             | No            | No        | Rhinovirus/Enterovirus (28.1)                                       |
| 5.        | A34       | 2 weeks          | Female | Yes                | No           | Yes             | Yes             | No            | No        | Rhinovirus/Enterovirus (34.3), RSV A+B (24.1), SARS-CoV-2 (35.5)    |
| 6.        | Z26       | 4 months         | Male   | No                 | Yes          | Yes             | Yes             | No            | No        | Rhinovirus/Enterovirus (30.8)                                       |
| 7.        | Z58       | 1 Month          | Female | No                 | No           | No              | No              | No            | No        | Rhinovirus/Enterovirus ( 26.5 ), RSV A+B (25.5)                     |
| 8.        | Z51       | 1 Month 3 weeks  | Female | No                 | No           | Yes             | Yes             | No            | No        | Parainfluenza virus 3 (31.0), Rhinovirus (32.0), Rsv A+B (26.5)     |
| 9.        | Z38       | 1 year 2 weeks   | Female | No                 | Yes          | No              | No              | No            | No        | SARS-CoV-2 (36.4)                                                   |
| 10.       | Z7        | 3 years 8 months | Male   | No                 | No           | No              | No              | No            | No        | SARS-CoV-2 (34.8)                                                   |
| 11.       | Z34       | 1 year 9 months  | Male   | No                 | Yes          | Yes             | Yes             | No            | No        | RSV A+B (26.0)SARS-CoV-2 (34.4).                                    |
| 12.       | Z32       | 1 year 4 months  | Male   | No                 | No           | Yes             | Yes             | No            | No        | RSV A+B (29.4)                                                      |
| 13.       | Z49       | 4 Months         | Female | No                 | No           | No              | No              | No            | No        | RSV A+B (15.3)                                                      |
| 14.       | Z75       | 2 years 3 Months | Male   | Yes                | No           | Yes             | No              | No            | No        | SARS-CoV-2 (35.2)                                                   |
| 15.       | Z27       | 3 months         | Male   | No                 | No           | No              | No              | No            | No        | RSV A+B (19.4), SARS-CoV-2 (32.9)                                   |
| 16.       | Z44       | 4 years 6 months | Male   | No                 | Yes          | Yes             | Yes             | No            | No        | Negative for All Viral agents                                       |
| 17.       | Z37       | 1 year 6 months  | Male   | No                 | No           | No              | No              | No            | No        | Rhinovirus (29.1), RSV A+B (20.8)                                   |
| 18.       | Z67       | 9 Months         | Female | No                 | No           | No              | No              | No            | No        | Parainfluenza virus 3 (26.3), Rhinovirus (33.4).                    |

|     |     |                   |        |     |     |     |     |    |     |                                                                           |
|-----|-----|-------------------|--------|-----|-----|-----|-----|----|-----|---------------------------------------------------------------------------|
| 19. | W43 | 1 Year 8 months   | Male   | No  | No  | No  | No  | No | No  | Negative for All Viral agents                                             |
| 20. | Z9  | 4 years 4 months  | Female | No  | Yes | No  | No  | No | No  | Rhinovirus (31.4), SARS Cov 2 (33.3), RSV A+B (30.2)                      |
| 21. | Z23 | 1 month 2 weeks   | Male   | No  | Yes | Yes | No  | No | No  | Coronavirus NL63 (34.2), RSV A+B (30.8)                                   |
| 22. | Z15 | 1 years 10 months | Male   | No  | No  | No  | No  | No | No  | Rhinovirus (32.9), RSV A+B (27.4), SARS CoV 2 (34.6)                      |
| 23. | W6  | 2 Months          | Male   | No  | Yes | Yes | No  | No | Yes | SARS CoV 2 (34.0)                                                         |
| 24. | W26 | 4 Years 3 months  | Female | No  | Yes | Yes | No  | No | No  | Coronavirus NL63 (34.8), Rhinovirus/Enterovirus (32.5)                    |
| 25. | W33 | 4 Years 4 months  | Female | No  | Yes | No  | No  | No | No  | Negative for All Viral agents                                             |
| 26. | W12 | 1 Years 9 months  | Male   | No  | No  | No  | No  | No | No  | Rhinovirus/Enterovirus (28.3), RSV A+B (22.9)                             |
| 27. | W3  | 10 Months         | Male   | No  | No  | Yes | Yes | No | No  | Rhinovirus/Enterovirus (32.5), RSV A+B (30.1)                             |
| 28. | W24 | 9 Months          | Male   | No  | No  | Yes | Yes | No | No  | Rhinovirus/Enterovirus (30.0)., RSV A+B (30.7)                            |
| 29. | W43 | 1 year 6 months   | Male   | No  | No  | No  | No  | No | No  | SARS-CoV-2 (36.2)                                                         |
| 30. | Z35 | 3 months          | Male   | No  | Yes | Yes | Yes | No | No  | SARS-CoV-2 (35.1), RSV A+B (30.6), Adenovirus (35.7)                      |
| 31. | Z45 | 1 year 1 month    | Female | Yes | No  | Yes | Yes | No | No  | RSV A+B (28.7), Coronavirus NL63 (32.0)                                   |
| 32. | W16 | 4 years 8 months  | Male   | No  | No  | No  | No  | No | No  | Rhinovirus (27.6)                                                         |
| 33. | W34 | 11 Months         | Male   | No  | No  | No  | No  | No | No  | Rhinovirus (30.3), Human metapneumovirus (31.1)                           |
| 34. | W41 | 2 Years 3 months  | Male   | No  | No  | No  | No  | No | No  | Coronavirus NL63 (29.1), Rhinovirus/Enterovirus (30.6), Adenovirus (35.7) |
| 35. | W40 | 1 month 1 week    | Female | No  | No  | Yes | No  | No | No  | Human metapneumovirus (34.3)                                              |
| 36. | W44 | 2 Years 4 months  | Female | Yes | No  | Yes | No  | No | No  | Rhinovirus (24.7)                                                         |
| 37. | W42 | 11 months         | Male   | No  | Yes | No  | No  | No | No  | Rhinovirus (27.6), Adenovirus (32.3)                                      |

|     |     |                  |        |     |     |     |     |    |     |                                                                                                |
|-----|-----|------------------|--------|-----|-----|-----|-----|----|-----|------------------------------------------------------------------------------------------------|
| 38. | W27 | 4 Years 2 months | Male   | No  | No  | No  | No  | No | No  | SARS-CoV-2 (33.6), Rhinovirus/Enterovirus (29.1)                                               |
| 39. | W19 | 11 months        | Male   | No  | No  | No  | No  | No | No  | RSV A+B (21.3)                                                                                 |
| 40. | W38 | 8 Months         | Male   | No  | Yes | Yes | No  | No | No  | RSV A+B (25.6) Parainfluenza virus 1 (33.1)                                                    |
| 41. | W32 | 3 Years 2 months | Female | No  | No  | No  | No  | No | No  | Negative for All Viral agents                                                                  |
| 42. | W22 | 3 Years 4 Months | Female | No  | No  | No  | No  | No | No  | Negative for All Viral agents                                                                  |
| 43. | W31 | 4 Years 4 months | Female | No  | No  | No  | No  | No | No  | Rhinovirus (28.5)                                                                              |
| 44. | W10 | 6 Months         | Male   | No  | Yes | Yes | Yes | No | Yes | SARS-CoV-2 (33.6), Rhinovirus/Enterovirus (28.5), RSV A+B (29.5)                               |
| 45. | A39 | 1 year 2 months  | Female | Yes | No  | Yes | No  | No | No  | SARS-CoV-2 (32.5), Parainfluenza virus 3 (28.9), RSV A+B (21.1)                                |
| 46. | A28 | 1 year 11 months | Male   | No  | No  | No  | No  | No | No  | RSV A+B (29.9)                                                                                 |
| 47. | Z24 | 10 months        | Female | No  | No  | No  | No  | No | No  | RSV A+B (30.6), Adenovirus (34.1)                                                              |
| 48. | A25 | 4 years 5 months | Female | No  | No  | No  | No  | No | No  | Negative for All Viral agents                                                                  |
| 49. | A33 | 2 months         | Male   | No  | No  | Yes | Yes | No | No  | Parainfluenza virus 3 (31.3), Rhinovirus (27.6), Adenovirus (33.7)                             |
| 50. | A23 | 5 months         | Male   | No  | No  | Yes | Yes | No | No  | SARS-CoV-2 (35.4), RSV A+B (20.7), Rhinovirus (32.3)                                           |
| 51. | A32 | 1 year 8 months  | Male   | No  | No  | No  | No  | No | No  | SARS-CoV-2 (36.2), RSV A+B (26.9), Rhinovirus/Enterovirus (29.3), Parainfluenza virus 3 (33.0) |
| 52. | A27 | 3 years 4 months | Female | Yes | No  | Yes | No  | No | No  | SARS-CoV-2 (33.7), Rhinovirus/Enterovirus (24.3)                                               |
| 53. | A30 | 2 years 2 months | Female | No  | No  | Yes | Yes | No | No  | SARS-CoV-2 (33.6), Parainfluenza virus 3 (32.3), Rhinovirus (29.3)                             |
| 54. | A26 | 1 months         | Male   | Yes | No  | Yes | Yes | No | No  | SARS-CoV-2 (33.1), Parainfluenza virus 3 (29.1), Rhinovirus (29.7)                             |
| 55. | A35 | 2 years 9 months | Male   | No  | No  | No  | No  | No | No  | RSV (33.4), SARS-CoV-2 (28.7)                                                                  |
| 56. | A31 | 3 months         | Male   | No  | Yes | No  | No  | No | No  | Rhinovirus/Enterovirus (31.0), SARS-CoV-2 (32.8)                                               |

|     |      |                   |        |     |     |     |     |    |     |                                                                                                  |
|-----|------|-------------------|--------|-----|-----|-----|-----|----|-----|--------------------------------------------------------------------------------------------------|
| 57. | A38  | 3 years 2 months  | Female | No  | No  | No  | No  | No | No  | Adenovirus (33.4), SARS-CoV-2 (32.5)                                                             |
| 58. | Z606 | 2 years 10 months | Female | No  | No  | No  | No  | No | No  | RSV A+B (22.6)                                                                                   |
| 59. | A40  | 1 year 3 months   | Male   | Yes | No  | No  | No  | No | No  | Rhinovirus/Enterovirus (26.7), SARS-CoV-2 (34.1)                                                 |
| 60. | W1   | 3 months          | Male   | No  | No  | Yes | Yes | No | No  | Rhinovirus (31.4), Adenovirus (35.1), RSV A+B (26.5), SARS-CoV-2 (35.3)                          |
| 61. | Z28  | 4 years 8 months  | Female | No  | No  | Yes | No  | No | Yes | Rhinovirus/Enterovirus (31.1), RSV A+B (28.7), SARS-CoV (35.5)                                   |
| 62. | Z53  | 11 months         | Male   | No  | No  | No  | No  | No | No  | Parainfluenza virus 3(25.6), Rhinovirus/Enterovirus (31.5), RSV A+B (33.8), SARS-CoV-2 (33.6)    |
| 63. | Z76  | 3 Months          | Male   | No  | No  | Yes | Yes | No | No  | RSV A+B (28.5)                                                                                   |
| 64. | Z78  | 8 months          | Female | No  | No  | No  | No  | No | No  | Parainfluenza virus 3 (33.3), SARS-CoV-2 (37.9)                                                  |
| 65. | Z16  | 16 months         | Female | No  | No  | No  | No  | No | No  | RSV A+B (31.5), Rhinovirus/Enterovirus (33.8)                                                    |
| 66. | W14  | 6 Months          | Male   | No  | Yes | Yes | Yes | No | No  | Negative for All Viral agents                                                                    |
| 67. | W8   | 13 Months         | Male   | No  | No  | Yes | No  | No | No  | RSV A+B (32.8), Rhinovirus/Enterovirus (32.4)                                                    |
| 68. | W7   | 16 Months         | Female | No  | No  | No  | No  | No | No  | Coronavirus NL63 (36.2), Parainfluenza virus 3 (32.0), Rhinovirus/Enterovirus (33.7)             |
| 69. | W29  | 1 Year 8 Months   | Male   | No  | No  | Yes | Yes | No | No  | Adenovirus (31.1)                                                                                |
| 70. | W13  | 10 Months         | Male   | No  | No  | Yes | Yes | No | No  | Coronavirus NL63 (30.9), RSV A+B (26.7)                                                          |
| 71. | W28  | 11 Months         | Female | No  | No  | No  | No  | No | No  | Coronavirus NL63 (34.2), RSV A+B (28.6), Rhinovirus/Enterovirus (34.4)                           |
| 72. | W11  | 2 years 2 months  | Female | No  | No  | No  | No  | No | No  | Rhinovirus/Enterovirus (28.6), SARS-CoV-2 (30.8)                                                 |
| 73. | W36  | 1 Year 1 month    | Male   | No  | No  | No  | No  | No | No  | Negative for All Viral agents                                                                    |
| 74. | Z60  | 1 Year 2 months   | Male   | No  | No  | No  | No  | No | No  | Parainfluenza virus 3(27.8), Rhinovirus/Enterovirus (32.3), Adenovirus (35.7), SARS-CoV-2 (35.3) |

|     |     |                   |        |     |     |     |     |             |    |                                                                                |
|-----|-----|-------------------|--------|-----|-----|-----|-----|-------------|----|--------------------------------------------------------------------------------|
| 75. | Z1  | 3 Years 5 months  | Male   | No  | No  | No  | No  | No          | No | Negative for All Viral agents                                                  |
| 76. | Z21 | 1 year 1 month    | Female | Yes | No  | Yes | Yes | No          | No | Parainfluenza virus 3( 31.7), Rhinovirus/Enterovirus (33.3), SARS-CoV-2 (34.9) |
| 77. | A1  | 1 year 9 months   | Male   | No  | No  | No  | No  | No          | No | Rhinovirus/Enterovirus (35.2) Adenovirus (26.3), SARS-CoV-2 (33.0)             |
| 78. | Z20 | 5 months          | Female | No  | Yes | No  | No  | Unspecified | No | RSV A+B (23.8) SARS-CoV-2 (37.9)                                               |
| 79. | Z19 | 1 year 4 months   | Male   | No  | No  | No  | No  | No          | No | RSV A+B (20.3)                                                                 |
| 80. | Z3  | 3 years 7 months  | Male   | No  | No  | No  | No  | No          | No | Rhinovirus/Enterovirus (32.6), SARS-CoV-2 (36.3)                               |
| 81. | Z5  | 5 months          | Female | No  | No  | No  | No  | No          | No | Rhinovirus/Enterovirus (33.6) RSV A+B (34.8)                                   |
| 82. | Z6  | 2 years 10 months | Female | No  | Yes | No  | No  | No          | No | RSV A+B (26.2)                                                                 |
| 83. | A37 | 4 years 1 month   | Male   | No  | No  | No  | No  | No          | No | Negative for All Viral agents                                                  |
| 84. | A36 | 3 years 2 months  | Female | No  | No  | Yes | Yes | No          | No | Rhinovirus/Enterovirus (30.9), SARS-CoV-2 (34.2)                               |
